# Supplementary material
Source: PubMed Central journal article supplement (PMC9075344)
Supplement: NIHMS1799096-supplement-5.pdf [file NIHMS1799096-supplement-5.pdf]

**Figure S1**

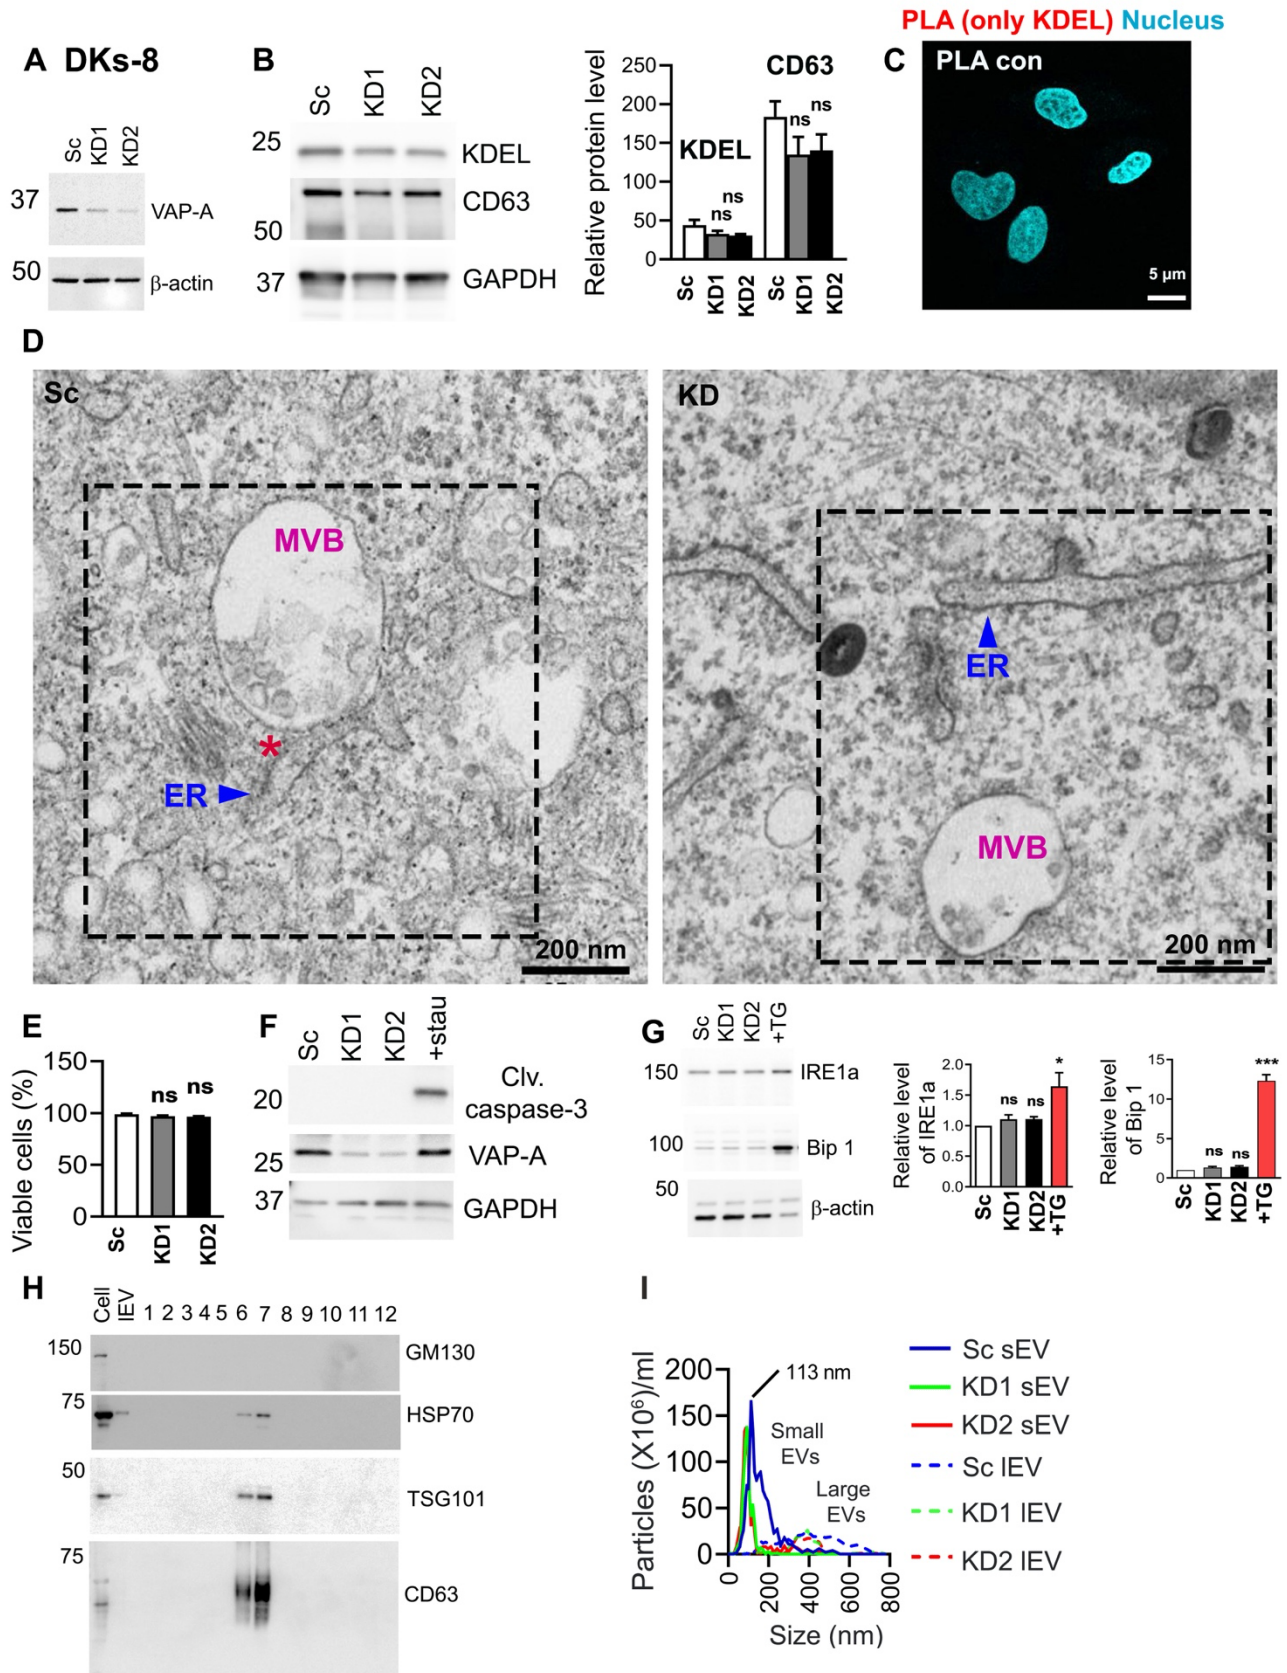

**Figure S1. Characterization of EVs and cells upon VAP-A KD in DKs-8 cells. Related to Figure 1.**

(A) Western blot analysis of VAP-A levels in control (Sc) and VAP-A KD (KD1 and KD2) DKs-8 cells. Beta actin serves as an endogenous control.

(B) Representative Western blot and quantitation of KDEL and CD63 levels for protein markers used in PLA experiments in Fig 1F. GAPDH serves as a loading control and is used to normalize levels in the graph. Quantitation from three independent experiments.

(C) Additional PLA control: KDEL only primary antibody+secondary antibodies does not yield fluorescence dots. CD63 only antibody gave similar results (not shown).

(D) Enlarged TEM images show ER and MVB membrane contact sites. Dashed boxes show the crops used for Fig 1G. Red asterisk indicates a membrane contact site in control (Sc) DKs-8 cell.

(E) Percent viability of control (Sc) and VAP-A KD (KD1, KD2) DKs-8 cells at the time of conditioned media collection. Data from three independent experiments.

(F) Representative Western blot of cleaved caspase-3, VAP-A and GAPDH in control (Sc) and VAP-A KD (KD1 and KD2) in DKs-8 cells; staurosporine (1  $\mu$ M, 3h) was used as positive apoptosis inducer. Images were representative from two independent experiments.

(G) Western blot analysis of ER stress. Representative immunoblots show ER stress markers (Bip-1 and IRE1a) in control (Sc) and VAP-A KD DKs-8 cells. Thapsigargin (ER stress inducer; 10  $\mu$ M, overnight) treatment of control cells serves as a positive control. Beta-actin serves as a loading control and was used to normalize the levels of IRE1a or Bip1 in the quantitation. Data from three independent experiments.

(H) Western blot analysis of positive EV markers (Hsp70, Tsg101 and CD63) and a negative EV marker (GM130) in DKs-8 cells, large EVs (IEV) and small EVs (fractions 6 and 7 of the density gradient).

(I) Graphs show nanoparticle tracking analyses (NTA) of small and large EVs isolated from control (Sc) and KD DKs-8 cells. Median of particle sizes from 3 independent experiments were combined and plotted. Note a shift in the KD small EV population towards smaller sizes.

Data plotted as Mean  $\pm$  S.E.M. \* $p$ <0.05, \*\* $p$ <0.01, \*\*\* $p$ <0.001.

Figure S2

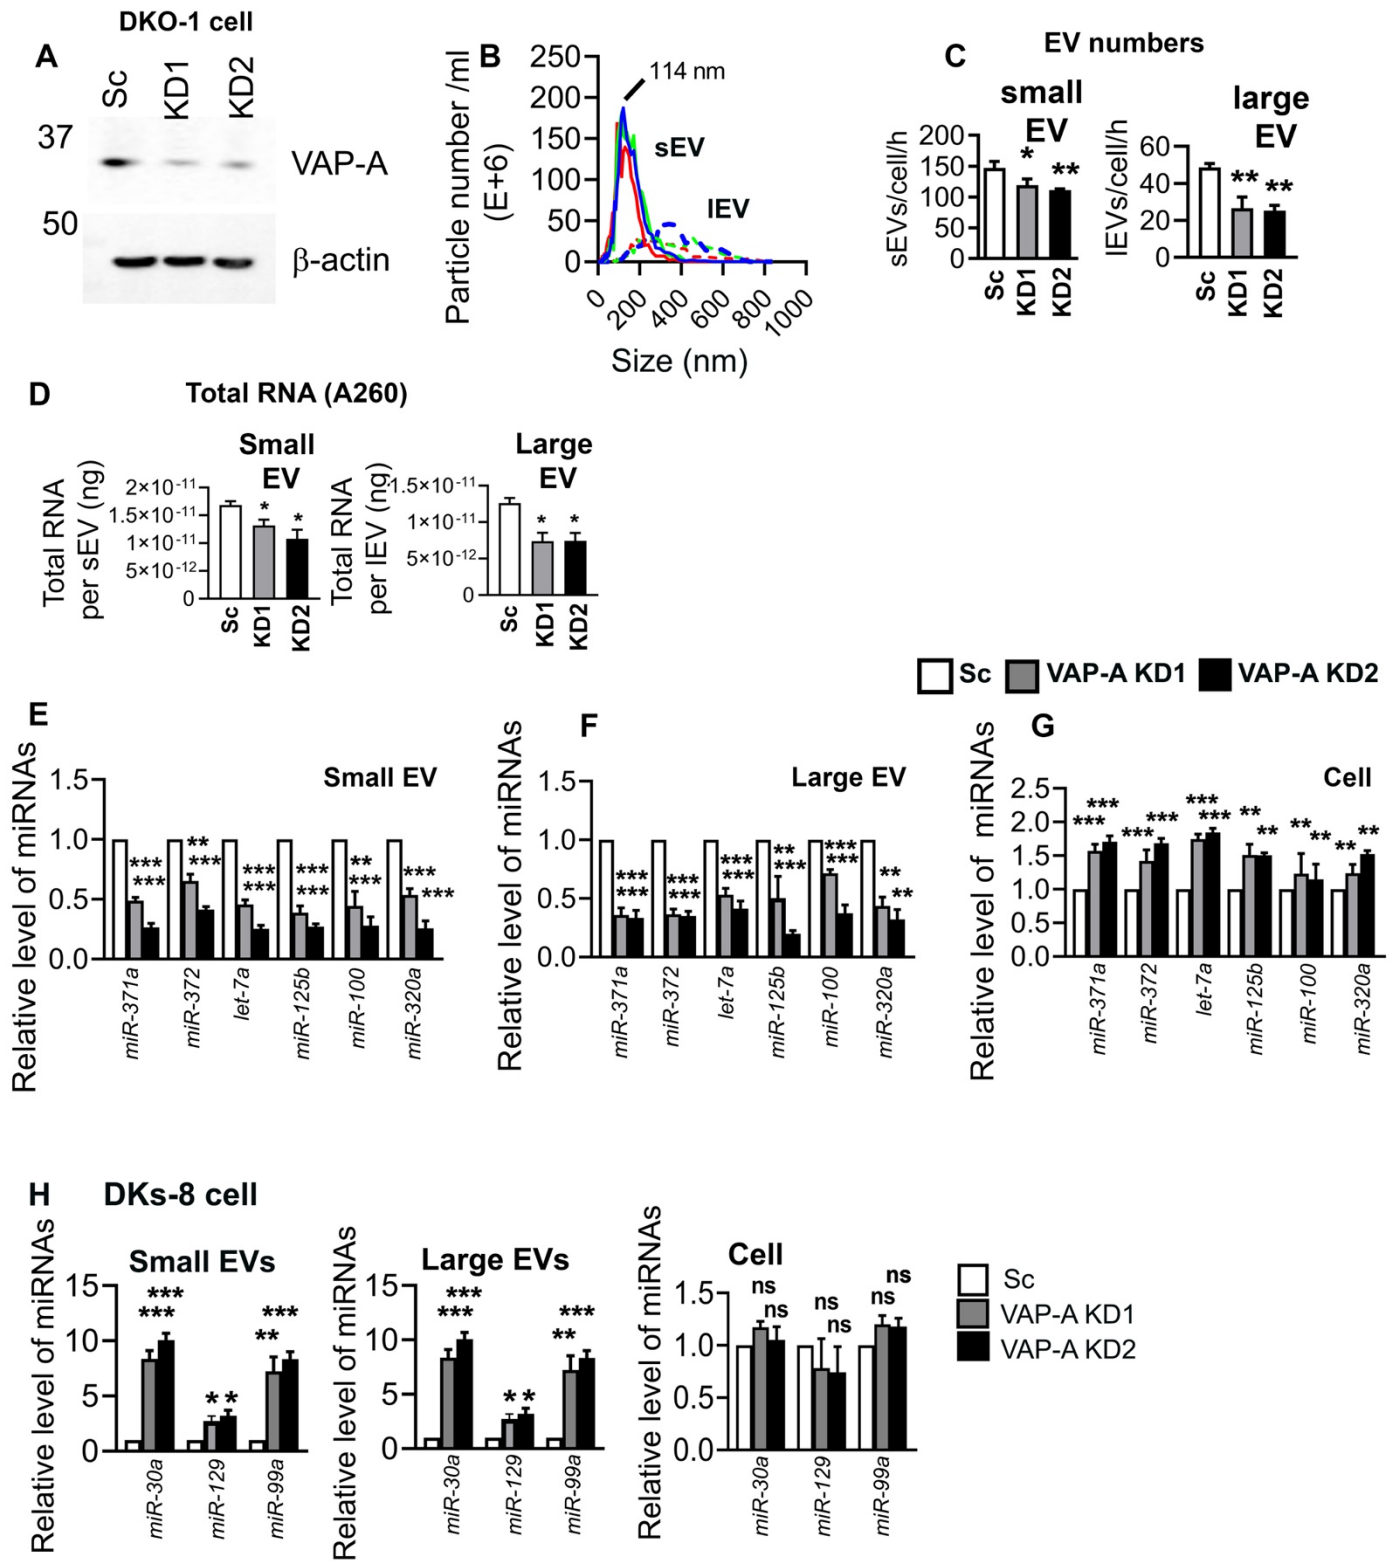

**Figure S2: VAP-A controls the number and RNA content of EVs released from DKO-1 cells. Related to Figures 1 and 2.**

(A) Western blot of VAP-A in DKO-1 colon cancer cells shows KD of VAP-A. Beta actin serves as a loading control.

(B) Graphs show nanoparticle tracking analyses (NTA) of small and large EVs isolated from control (Sc) and KD DKO-1 cells. Median of particle sizes from 3 independent experiments were combined and plotted.

(C) EV secretion rates calculated from NTA data for EVs isolated from control (Sc) and VAP-A KD DKO-1 cell conditioned media. Data from three independent experiments (E and F).

(D) Total RNA was extracted from a known number of purified EVs and measured by NanoDrop (A260). The concentration of RNA was plotted per small or large EV. Data from three independent experiments.

(E-G) Graphs show relative level of specific miRNAs quantified by qRT-PCR in small and large EVs purified from control (Sc) and VAP-A KD DKO-1 cells and from their respective parental cells. Data from three independent experiments.

(H) Relative levels of specific upregulated microRNAs (*miR-30a*, *miR-129*, and *miR-99*) quantified by qPCR and normalized to U6 snRNA in small and large EVs and in their parental control (Sc) or VAP-A KD DKs-8 cells. Data from three independent experiments.

Data were plotted as Mean  $\pm$  S.E.M.  $p^* < 0.05$ ,  $p^{**} < 0.01$ ,  $p^{***} < 0.001$ .



Figure S3

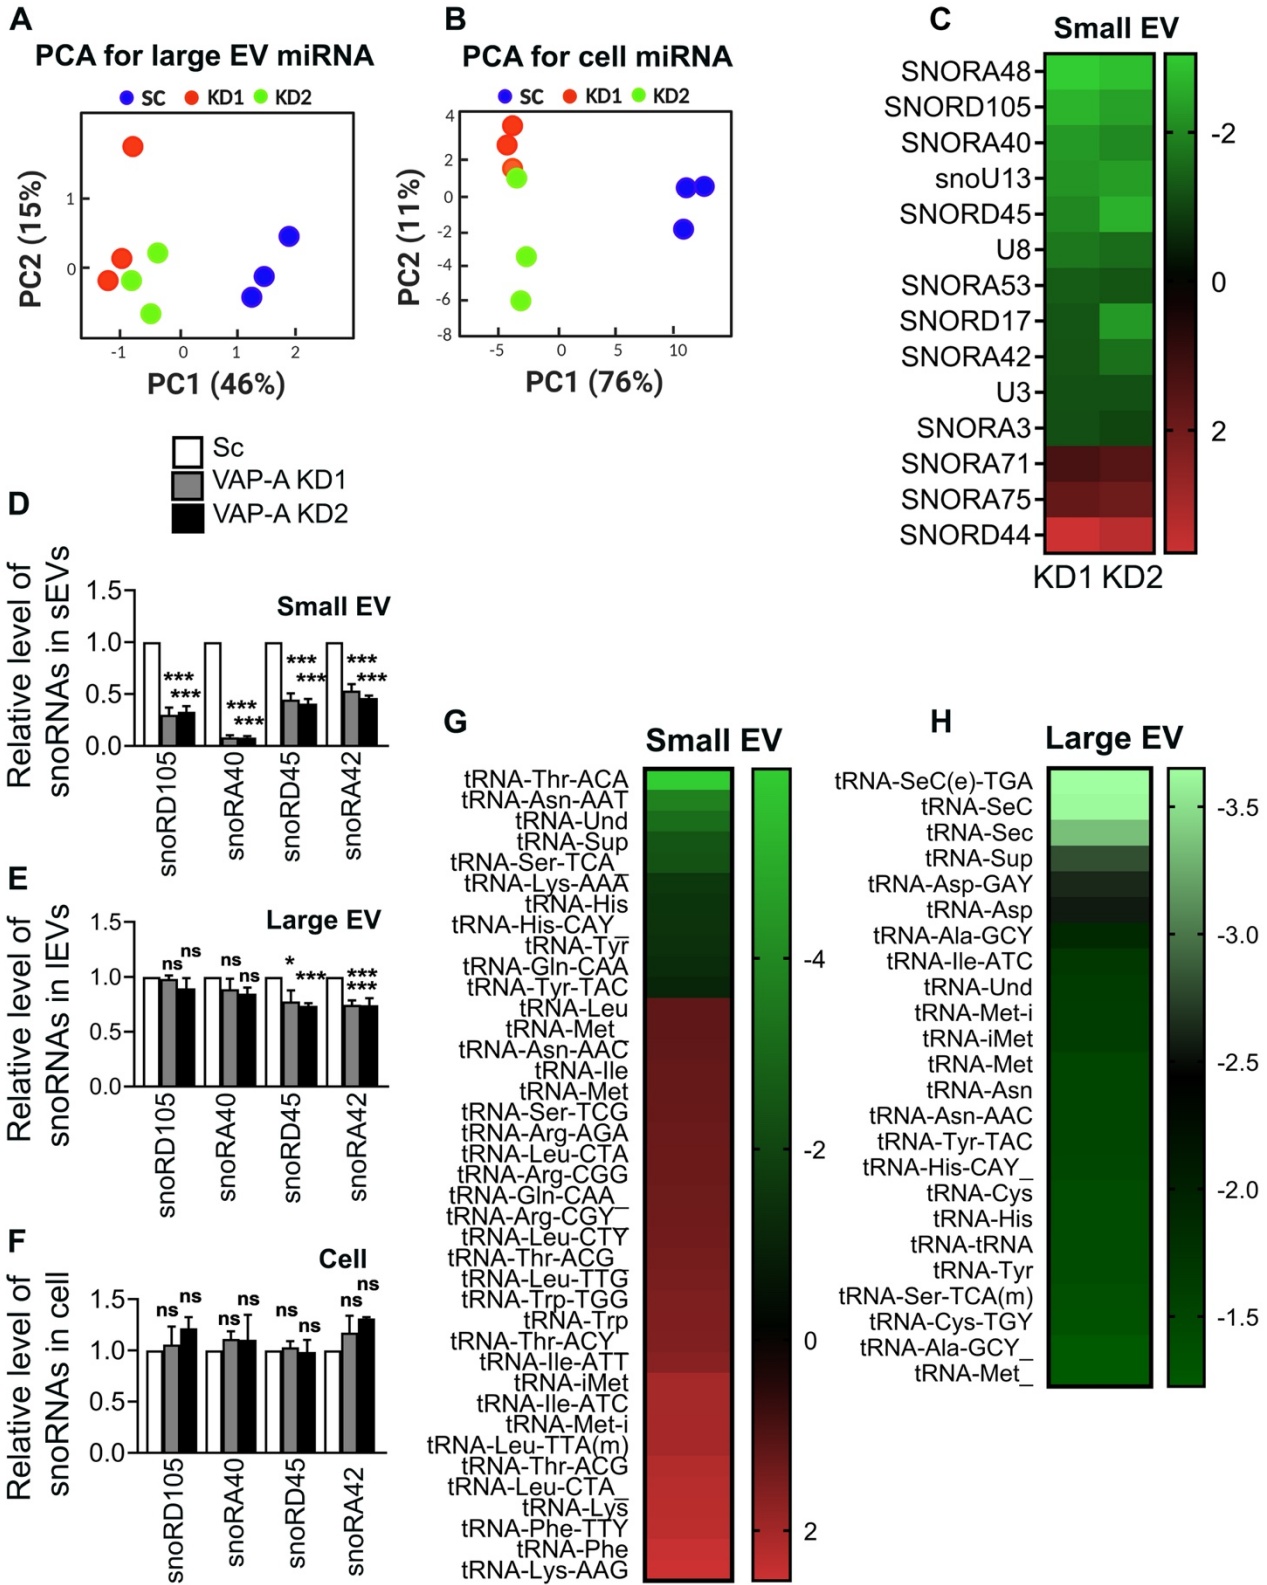

**Figure S3. VAP-A regulates the levels of small RNAs in EVs. Related to Figure 2.**

(A and B) Principal component analysis (PCA) shows that VAP-A KD affects the miRNA composition of large EVs and cells.

(C) Analysis of small RNA-Seq data. Levels (log 2-fold change) of snoRNAs in small and large EVs were normalized to levels in their parental cells and then compared between control and VAP-A KD. Heatmap shows altered snoRNAs in VAP-A KD small EVs purified from DKs-8 cells using criteria  $\leq 0.5$  or  $\geq 2$  fold change and FDR value  $< 0.05$ . Green shows downregulated whereas red shows upregulated RNAs. Levels plotted as log 2-fold change.

(D-F) Relative levels of specific snoRNAs quantified by qPCR and normalized to U6 snRNA in small EVs, large EVs and their parental control (Sc) or VAP-A KD DKs-8 cells, as indicated above. Data from three independent experiments.

(G and H) Heatmap analyses of small RNA-Seq data show altered tRNA fragments in small and large EVs in VAP-A KD conditions, using criteria  $\leq 0.5$  or  $\geq 2$  fold change and FDR value  $< 0.05$ . Levels plotted as log 2-fold change.

Bar graphs show Mean  $\pm$  S.E.M. \* $p < 0.05$ , \*\* $p < 0.01$ , \*\*\* $p < 0.001$ .

**Figure S4**

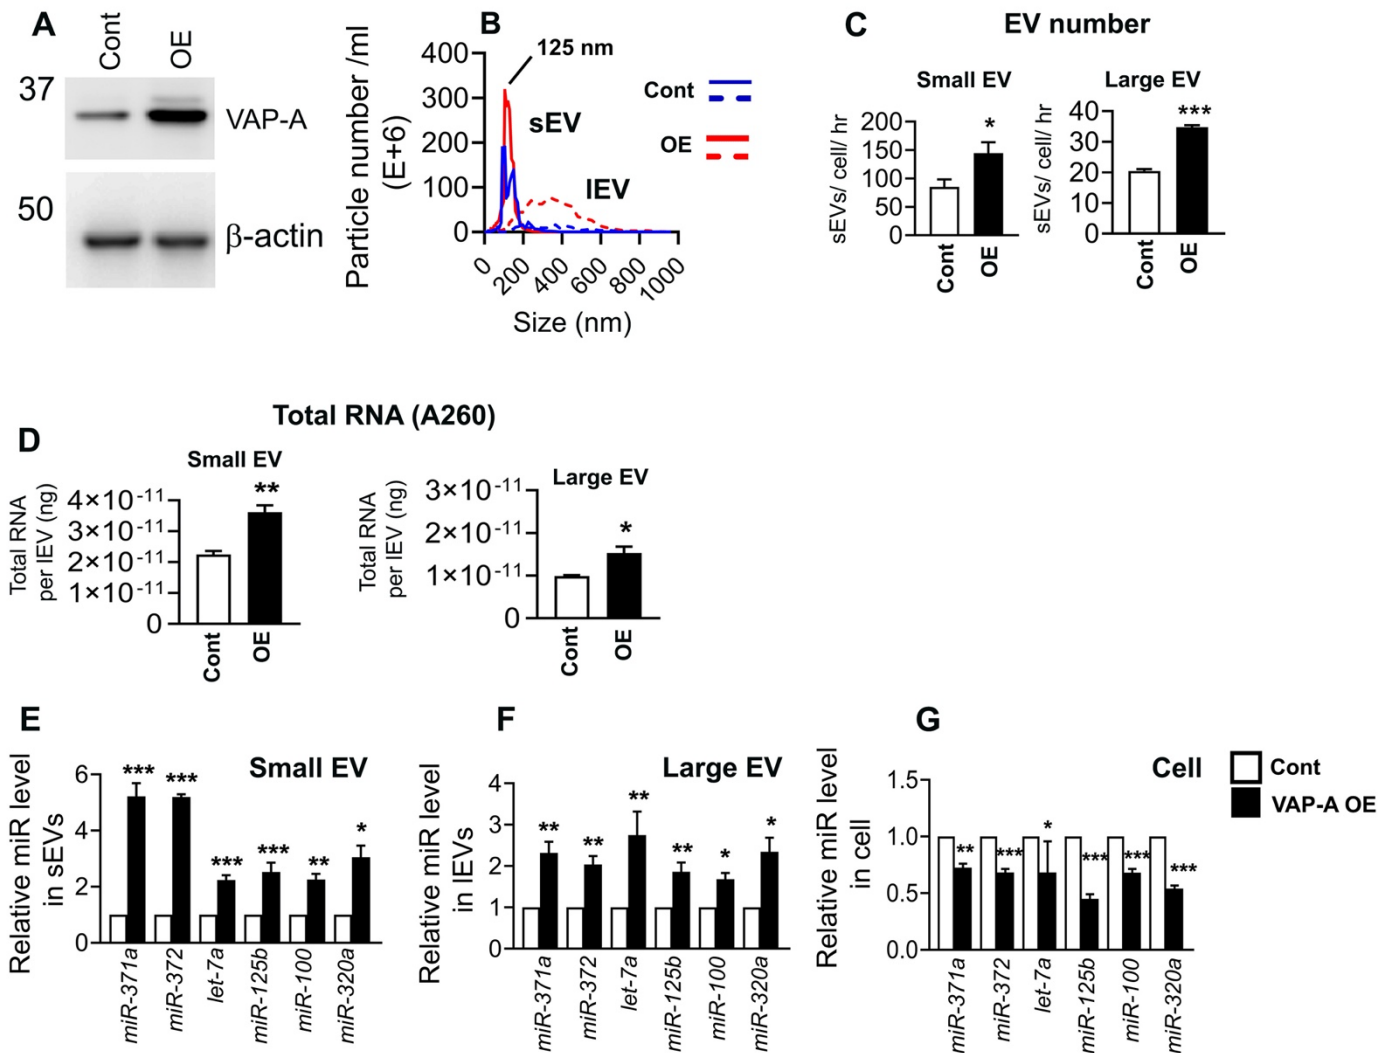

**Figure S4. VAP-A overexpression enhances the number and RNA content of EVs. Related to Figures 1 and 2.**

(A) Western blot of VAP-A in DKs-8 cells shows overexpression (OE) of VAP-A. Beta actin serves as an endogenous control.

(B) NTA traces from large (IEV) and small (sEV) EVs purified from control (Cont) and VAP-A OE cells. Median values were combined for each condition and plotted from three independent NTA experiments.

(C) Calculation of small and large EV secretion rate from control and VAP-OE cells based on NTA analysis of purified EVs and known cell number and media conditioning time. From three independent NTA experiments.

(D) Total RNA concentration (measured by NanoDrop (A260)) per EV (measured by NTA) for EVs purified from control and VAP-A OE DKs-8 cells.

(E-G) Relative levels of specific miRNAs in small and large EVs purified from control (Cont) and VAP-A OE (OE) DKs-8 cells and their parental cells. Data from three independent experiments.

Data were plotted as Mean  $\pm$  S.E.M. \* $p$ <0.05, \*\* $p$ <0.01, \*\*\* $p$ <0.001.

Figure S5

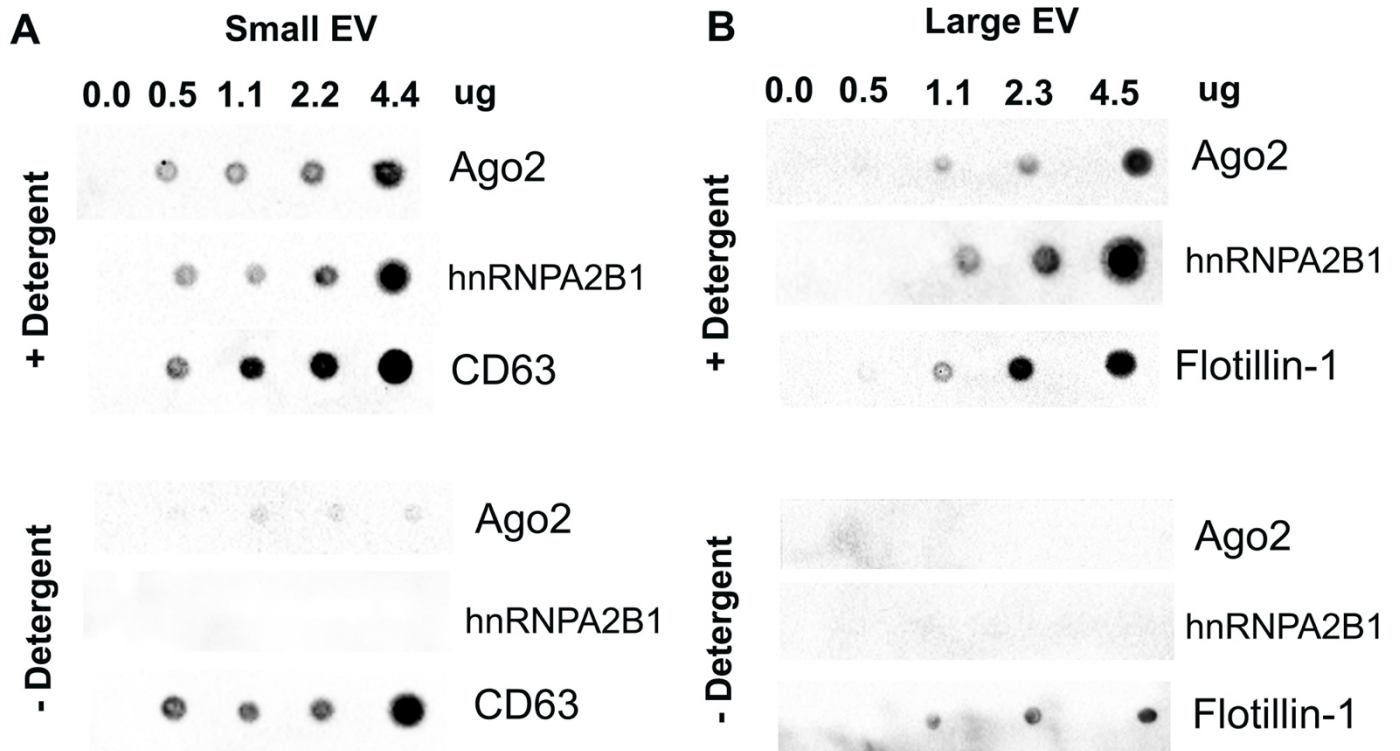

Figure S5: RBPs are present on the inside of small and large EVs. Related to Figure 2.

(A and B) Different concentrations of small and large EVs from DKs-8 cells were dotted on nitrocellulose membranes and probed with anti-Ago2, anti-hnRNPA2B1, anti-CD63 or anti-flotillin-1 antibodies in the presence (+Detergent) or absence (-Detergent) of 0.1% Tween-20 as shown. Representative of three independent experiments.

**Figure S6**

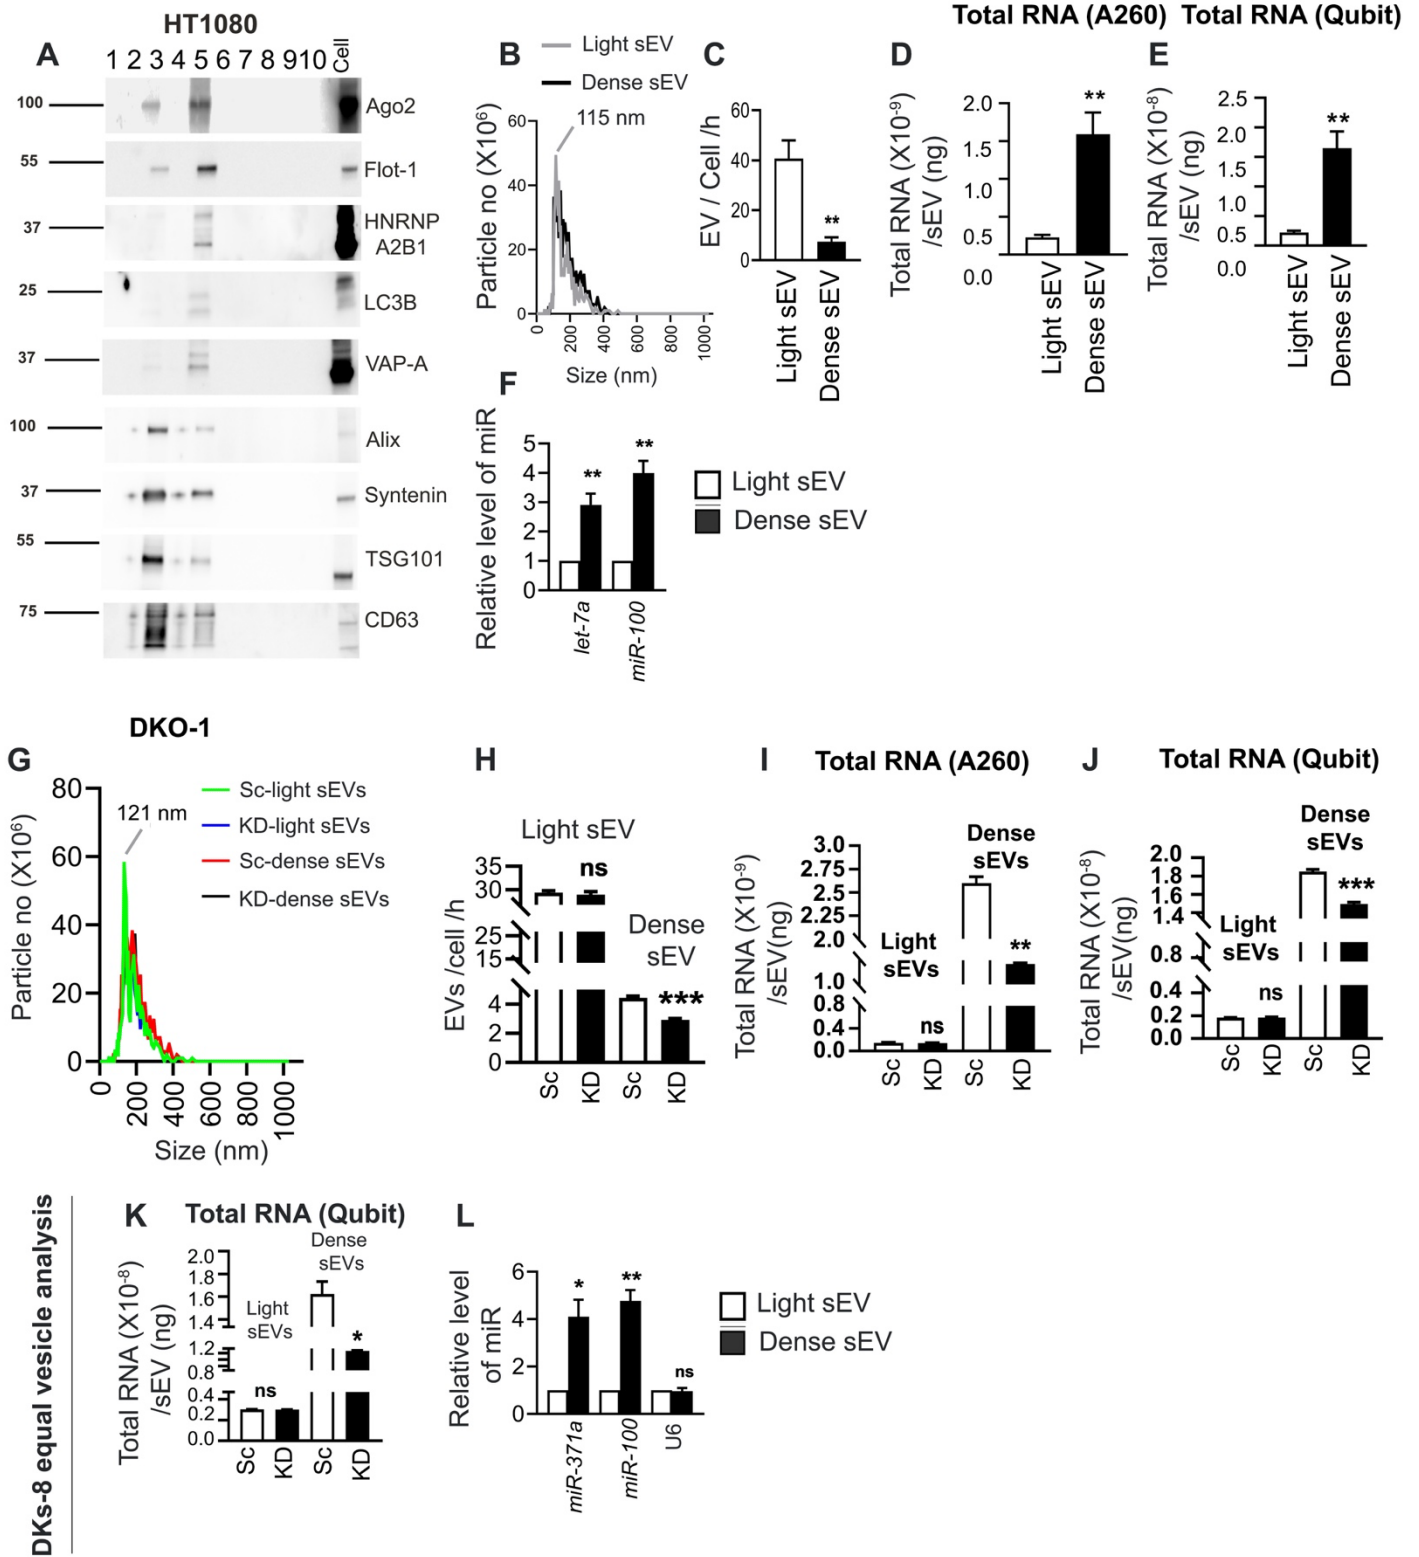

**Figure S6: Analysis and characterization of “light” and “dense” EVs. Related to Figure 3.**

(A) Representative immunoblots of different EV cargo and marker proteins (Ago2, Flotillin-1, hnRNPa2b1, LC3B, VAP-A, Alix, syntenin, Tsg101 and CD63) show enrichment of different cargoes in fractions 3 and 5 of “light” and “dense” EVs purified from parental HT1080 cells. Blots representative of three independent experiments.

(B) Nanoparticle traces of “light” and “dense” small EVs purified from parental HT1080 cells.

(C) EV concentration of “light” and “dense” EVs purified from HT1080 were plotted.

(D and E) Total RNA quantity per “light” and “dense” small EV measured by A260 with NanoDrop (D) or Qubit (E) from HT1080 cells. Data from three independent experiments.

(F) Relative levels of *let-7a* and *miR-100* were calculated for light and dense small EVs purified from HT1080 and plotted. U6 serves as endogenous control that remains unchanged. Data were calculated from three independent experiments with three technical replicates.

(G) Nanoparticle traces of “light” and “dense” small EVs purified from parental DKO-1 cells.

(H) EV concentration of “light” and “dense” EVs purified from DKO-1 cells were plotted.

(I and J) Total RNA quantity per “light” and “dense” small EV measured by A260 with NanoDrop (I) or Qubit (J) from DKO-1 cells. Data from three independent experiments.

(K) Total RNA was extracted from equal number of “light” and “dense” vesicles purified from DKs-8 cells and measured by Qubit and plotted as RNA per vesicle. Data from three independent experiments.

(L) Graph shows relative level of *miR-371*, *miR-100* and U6. QRT-PCR were performed with equal volume of total RNA extracted from equal “light” and “dense” EVs purified from DKs-8 cells. Data were calculated from three independent experiments with three technical replicates.

Data were plotted as Mean  $\pm$  S.E.M. \* $p < 0.05$ , \*\* $p < 0.01$ , \*\*\* $p < 0.001$ .



**Figure S7**

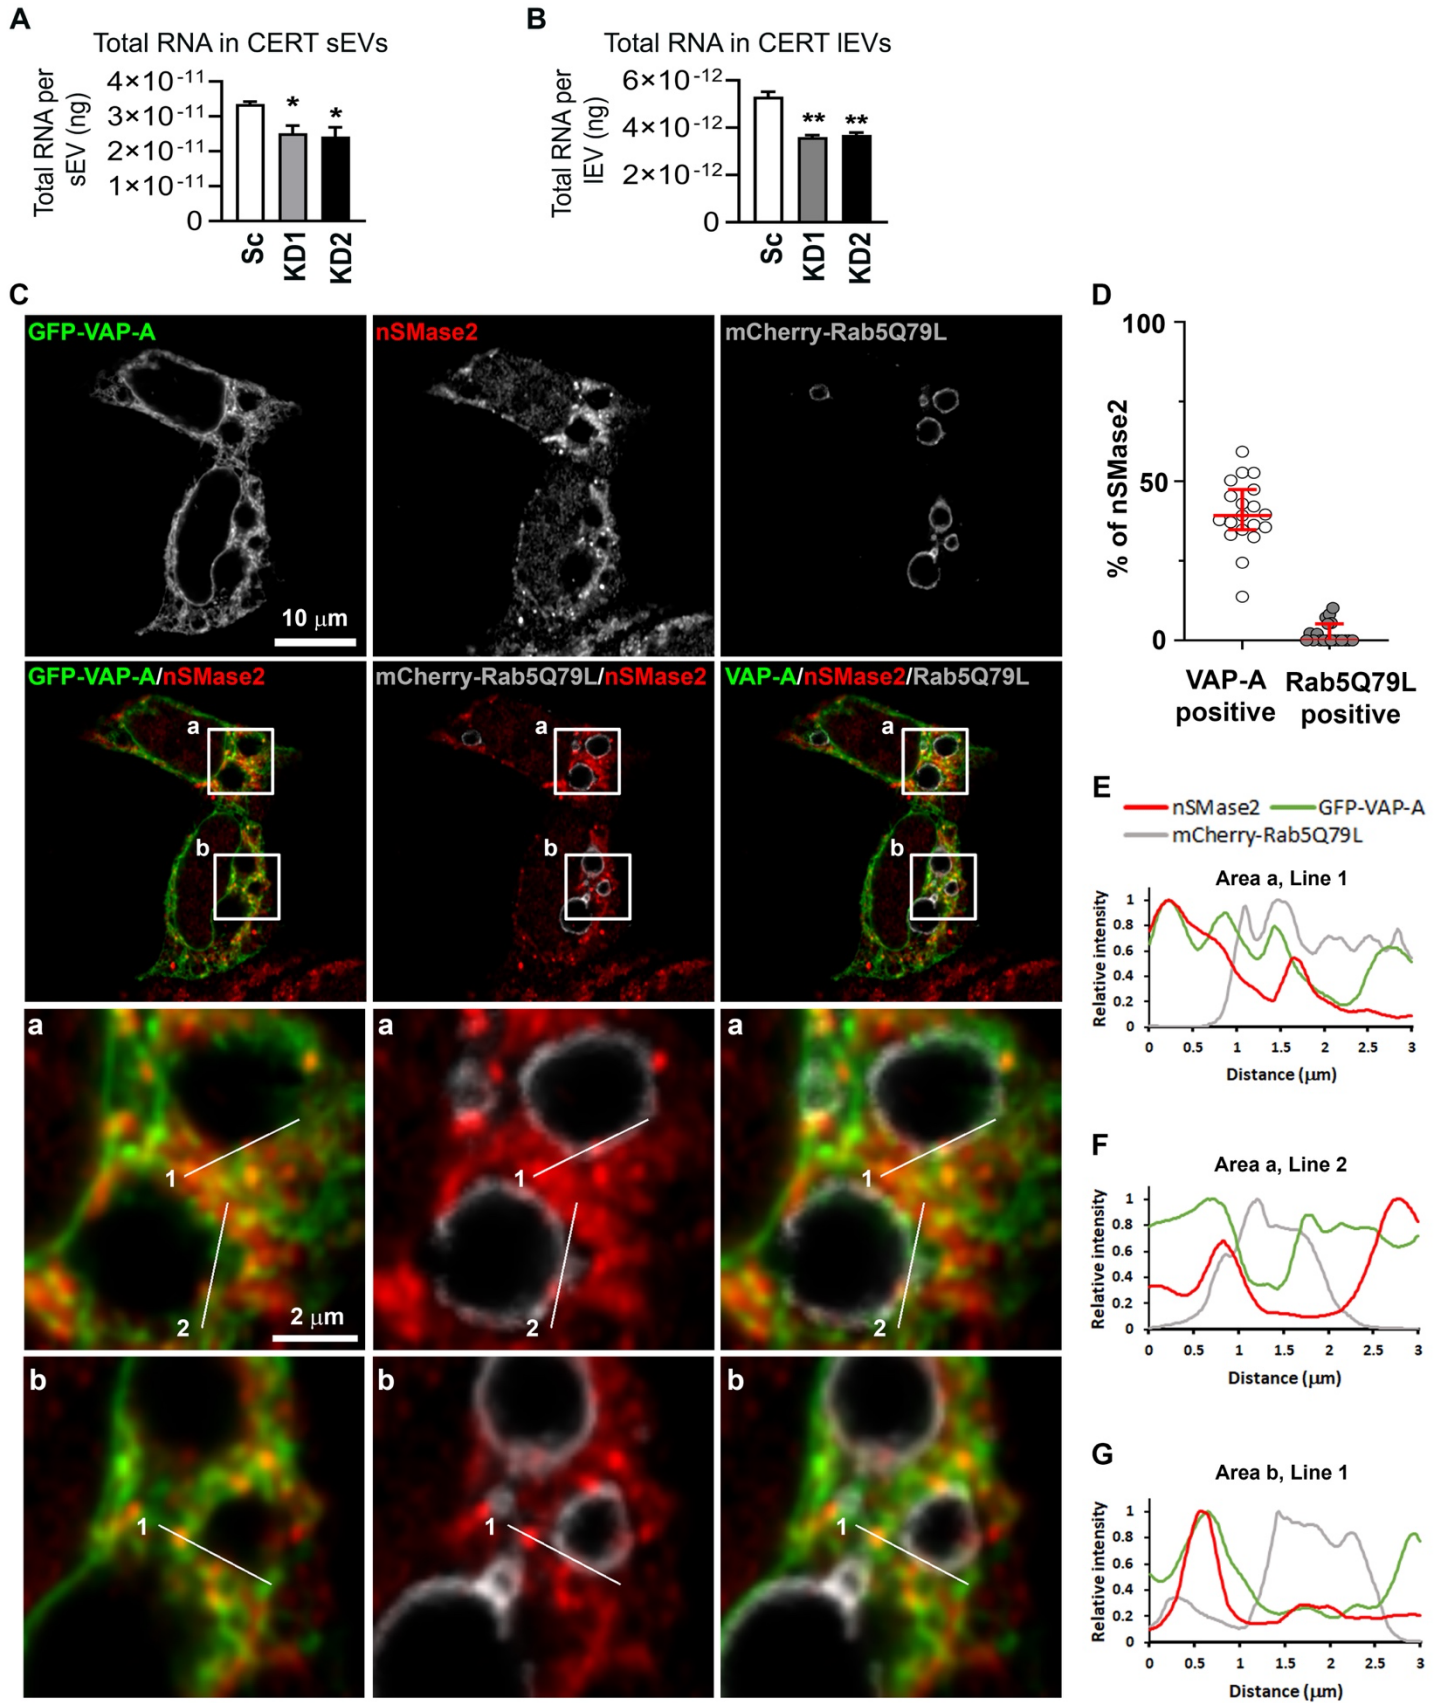

**Figure S7. nSMase2 is closely associated with VAP-A-positive ER. Related to Figure 7.**

(A and B) Total RNA quantity per small and large EV purified from control (Sc) and CERT KD (KD1 and KD2) were calculated and plotted from three independent experiments as mean  $\pm$  S.E.M. \* $p < 0.05$ , \*\* $p < 0.01$

(C) Representative merged (not deconvolved) image of GFP-VAP-A and mCherry-Rab5Q79L-cotransfected DKs-8 cells with nSMase2 immunofluorescence staining. Lettered and selected areas are enlarged at the bottom. Numbered lines were scanned for the intensity of each fluorescence channel of the images and plotted at (E-G).

(D) Colocalization of nSMase2 with GFP-VAP-A and mCherry-Rab5Q79L was plotted as median with interquartile range, respectively.  $n = 19$  cells from 2 independent experiments.
